# Supplementary material for: CN_Wheat10: a 10 m resolution dataset of spring and winter wheat distribution in China (2018–2024) derived from time-series remote sensing
Source: Copernicus journal article supplement (doi:10.5194/essd-18-465-2026), 2026-01-19
Supplement: Supplementary file 1 [file essd-18-465-2026-supplement.pdf]

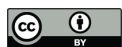

## *Supplement of*

# **CN\_Wheat10: a 10 m resolution dataset of spring and winter wheat distribution in China (2018–2024) derived from time-series remote sensing**

**Man Liu et al.**

*Correspondence to:* Hongyan Zhang (zhanghongyan@cug.edu.cn)

The copyright of individual parts of the supplement might differ from the article licence.

**Table S1: Details of the spectral indices used in this study.**

| Index  | Full name                                        | Formula                          | References                     |
|--------|--------------------------------------------------|----------------------------------|--------------------------------|
| EVI    | Enhanced vegetation index                        | $(B8-B4) / (B8+6*B4-7.5*B2+1)$   | (Huete et al., 2002)           |
| GCVI   | Green chlorophyll vegetation index               | $B8 / B3-1$                      | (Gitelson et al., 2003)        |
| GNDVI  | Green normalized difference vegetation index     | $(B8-B3) / (B8+B3)$              | (Gitelson et al., 1996)        |
| LSWI   | Land surface water index                         | $(B8-B11) / (B8+B11)$            | (Xiao et al., 2006)            |
| NDVI   | Normalized difference vegetation index           | $(B8-B4) / (B8+B4)$              | (Huete et al., 2002)           |
| NDWI   | Normalized difference water index                | $(B3-B8) / (B3+B8)$              | (Gao, 1996)                    |
| NDYI   | Normalized Difference Yellowness Index           | $(B3-B2) / (B3+B2)$              | (Sulik and Long, 2016)         |
| NREDI1 | Normalized red edge1 difference vegetation index | $(B6-B5) / (B6+B5)$              |                                |
| NREDI2 | Normalized red edge2 difference vegetation index | $(B7-B5) / (B7+B5)$              | (Gitelson and Merzlyak, 1994)  |
| NREDI3 | Normalized red edge3 difference vegetation index | $(B7-B6) / (B7+B6)$              |                                |
| OSAVI  | Optimized soil adjusted vegetation index         | $1.5*(B8-B4) / (B8+B4+0.16)$     | (Rondeaux et al., 1996)        |
| PSRI   | Plant senescence reflectance index               | $(B4-B3) / B8$                   | (Fernández-Manso et al., 2016) |
| RVI    | Ratio Vegetation Index                           | $B8 / B4$                        | (Jordan, 1969)                 |
| SWI    | Shade water index                                | $B2+B3-B8$                       | (Li et al., 2016)              |
| WRI    | Winter rapeseed index                            | $B2*(B8-B3) / ((B8+B3)*(B4+B3))$ | (Zhang et al., 2022)           |

### S1: The details of the sample point data

Approximately 2,000–3,000 points were collected from field surveys each year during 2020–2024. These field samples were mainly distributed in the Huang-Huai-Hai Plain and the middle and lower reaches of the Yangtze River Plain, with smaller numbers in other provinces. The spatial distribution of the field survey samples is illustrated in Fig.S1.

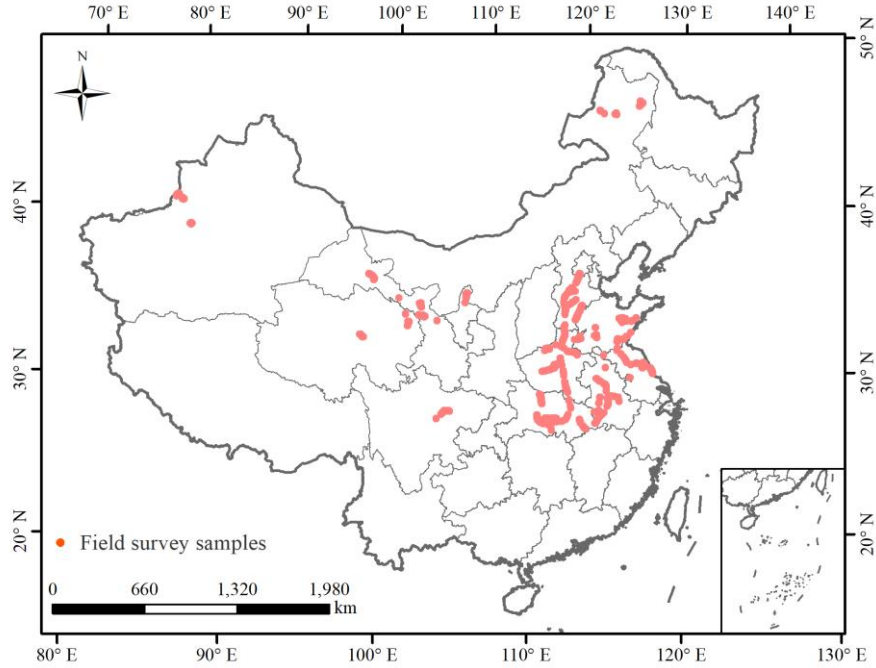

**Figure S1: Spatial distribution of sample points from field surveys in 2020-2024.**

In the process of visual interpretation of remote sensing images, wheat is distinguished from other crop types mainly based on three criteria, taking winter wheat as an example: (1) Temporal dynamics (Fig.S2(a)): multi-temporal imagery from October to the following June reveals the complete growth cycle of winter wheat, including sowing, overwintering, regreening, jointing, heading, grain filling, and maturity, while other crops exhibit distinct temporal profiles; (2) Spectral characteristics (Fig.S2(b)): winter wheat demonstrates high vegetation indices during the mid-growing season (around April), appearing as dark green in imagery, whereas rapeseed typically appears yellow and garlic is often light green; (3) Texture and spatial distribution (Fig.S2(b)): winter wheat fields are generally regular in shape and spatially aggregated, in contrast to other land cover types, which often appear fragmented or irregular.

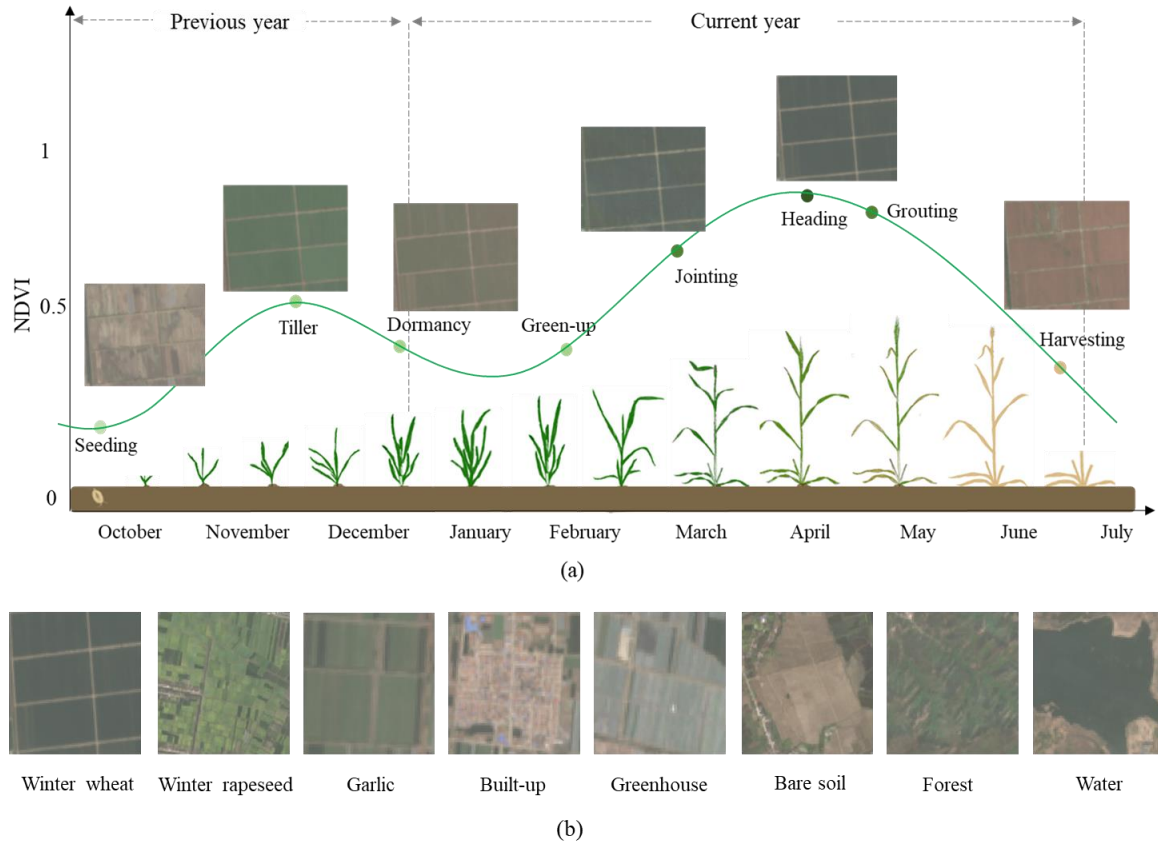

**Figure S2: Distinguishing winter wheat from other land-cover types based on visual interpretation from Sentinel-2 images. (a) Phenological spectrum curve of winter wheat and remote sensing image characteristics at different growth stages. (b) Spectral texture characteristics of winter wheat and other land-cover types in April.**

As shown in Fig.S3, we take Xinyang City in Henan Province as an example to demonstrate the spatial hierarchical sampling strategy based on quadrilateral grids. We first divided the study area into a series of regular quadrilateral grids within the Google Earth Engine platform and examined the monthly Sentinel-2 composite imagery from October to the following June. During the interpretation process, all land cover types were classified into six categories: winter wheat, built-up, water, trees, bare land, and other crops. Based on the proportional coverage of each land cover type within a grid, no more than 10 sample points were randomly selected per grid, thereby avoiding excessive spatial clustering of samples. Specifically, for grids containing wheat fields, 1–8 wheat samples were randomly selected in proportion to the wheat coverage within the grid, along with additional non-wheat samples to maintain category balance. For grids without wheat fields, 1–2 non-wheat samples were randomly selected for each category, including built-up land, trees, water bodies, and bare land. This approach ensured both the spatially uniform distribution of samples and the representativeness of diverse land cover types.

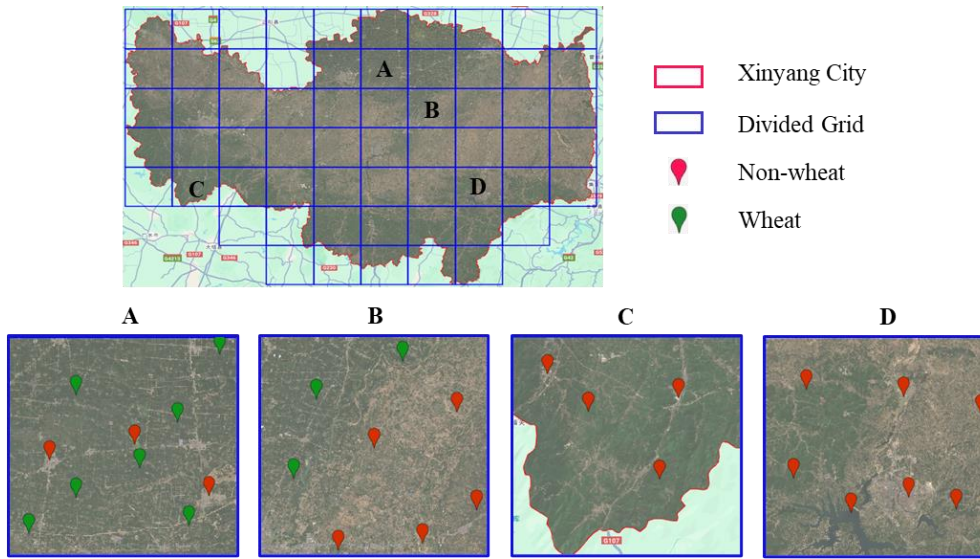

**Figure S3: Spatial stratified sampling strategy in Xinyang City based on Sentinel-2 imagery processed in Google Earth Engine.**  
**Imagery © 2024 ESA, Map data © 2025 Google.**

**Table S2: Distribution of wheat verification points in each province.**

|       | 2018 (VI) |           | 2019 (VI) |           | 2020 (FS+VI) |           | 2021 (FS+VI) |           | 2022 (FS+VI) |           | 2023 (FS+VI) |           | 2024 (FS+VI) |           |
|-------|-----------|-----------|-----------|-----------|--------------|-----------|--------------|-----------|--------------|-----------|--------------|-----------|--------------|-----------|
|       | wheat     | non-wheat | wheat     | non-wheat | wheat        | non-wheat | wheat        | non-wheat | wheat        | non-wheat | wheat        | non-wheat | wheat        | non-wheat |
| AH    | 467       | 1503      | 533       | 1486      | 2024         | 3275      | 1175         | 5042      | 602          | 1944      | 334          | 2344      | 555          | 3479      |
| HB    | 512       | 1967      | 458       | 2099      | 1595         | 2881      | 1362         | 2436      | 877          | 2260      | 685          | 2253      | 466          | 2121      |
| HN    | 726       | 3586      | 668       | 3000      | 1581         | 5752      | 1158         | 4630      | 907          | 3570      | 836          | 3581      | 713          | 3447      |
| HuB   | 477       | 2329      | 372       | 2004      | 605          | 2663      | 466          | 2675      | 422          | 2690      | 458          | 765       | 438          | 3173      |
| JS    | 522       | 2243      | 451       | 2119      | 1425         | 3877      | 597          | 2746      | 692          | 2291      | 479          | 2076      | 538          | 2243      |
| SD    | 722       | 3324      | 616       | 3263      | 2421         | 5658      | 1196         | 4227      | 978          | 3330      | 738          | 3209      | 700          | 3335      |
| SX    | 544       | 1828      | 337       | 1782      | 583          | 2789      | 782          | 2157      | 309          | 1952      | 247          | 1672      | 306          | 1754      |
| SAX   | 461       | 1981      | 566       | 2073      | 196          | 1879      | 608          | 2596      | 500          | 1774      | 488          | 1770      | 359          | 1942      |
| SC    | 301       | 2683      | 326       | 2812      | 786          | 3768      | 314          | 3368      | 309          | 2921      | 218          | 2552      | 311          | 2717      |
| ZJ    | 261       | 1493      | 252       | 1491      | 980          | 1725      | 179          | 1689      | 422          | 1668      | 387          | 1415      | 390          | 1597      |
| XJ    | 1161      | 5423      | 1054      | 5438      | 807          | 5161      | 1017         | 5331      | 1050         | 5412      | 802          | 5259      | 887          | 5221      |
| GS    | 713       | 5500      | 786       | 5440      | 1234         | 5223      | 710          | 5776      | 975          | 6832      | 799          | 6729      | 707          | 7226      |
| NM    | 555       | 4959      | 514       | 4860      | 782          | 3753      | 436          | 4325      | 403          | 4667      | 738          | 5902      | 655          | 4694      |
| QH    | 353       | 3108      | 452       | 3123      | 529          | 2806      | 412          | 3042      | 301          | 2826      | 363          | 3306      | 445          | 3328      |
| NX    | 427       | 2804      | 499       | 2834      | 385          | 3013      | 443          | 2739      | 518          | 2779      | 464          | 2694      | 435          | 2821      |
| Total | 52933     |           | 51708     |           | 70156        |           | 63634        |           | 56181        |           | 53563        |           | 57003        |           |

Note: FS refers to verification data obtained from field survey, VI refers to verification data obtained from visual interpretation of high-resolution images

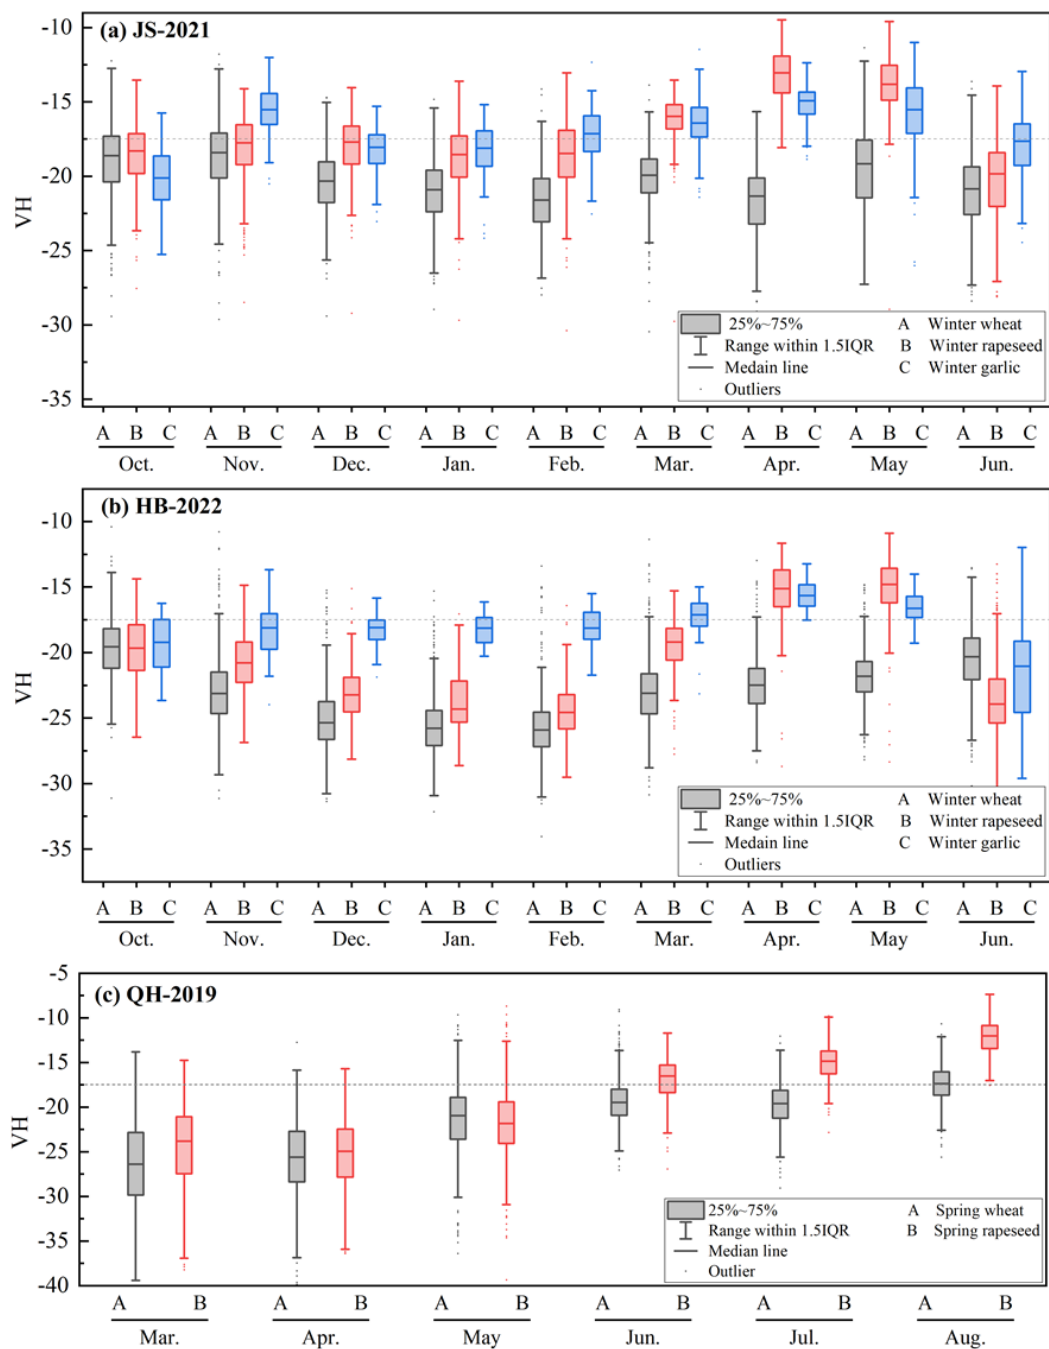

**Figure S4. Distribution of VH backscatter values of different crops in Jiangsu Province (2021), Hebei Province (2022) and Qinghai Province (2019).**

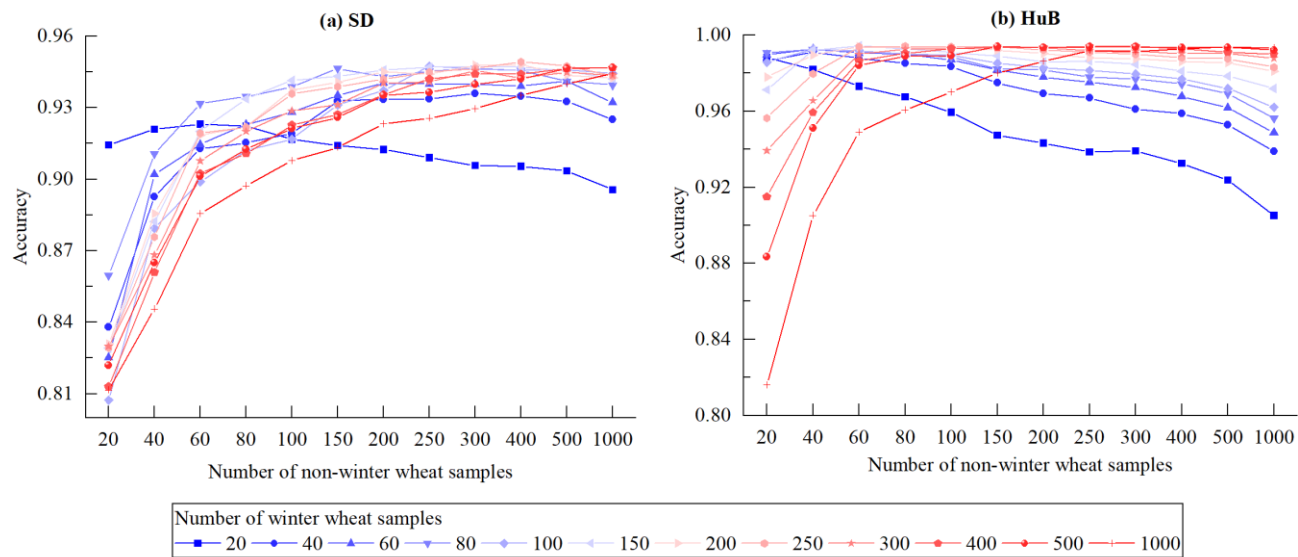

**Figure S5. Changes in accuracy of winter wheat mapping under different sample sizes. (a) Variation trend of wheat accuracy in Shandong (SD) province. (b) Variation trend of wheat accuracy in Hubei (HuB) province.**

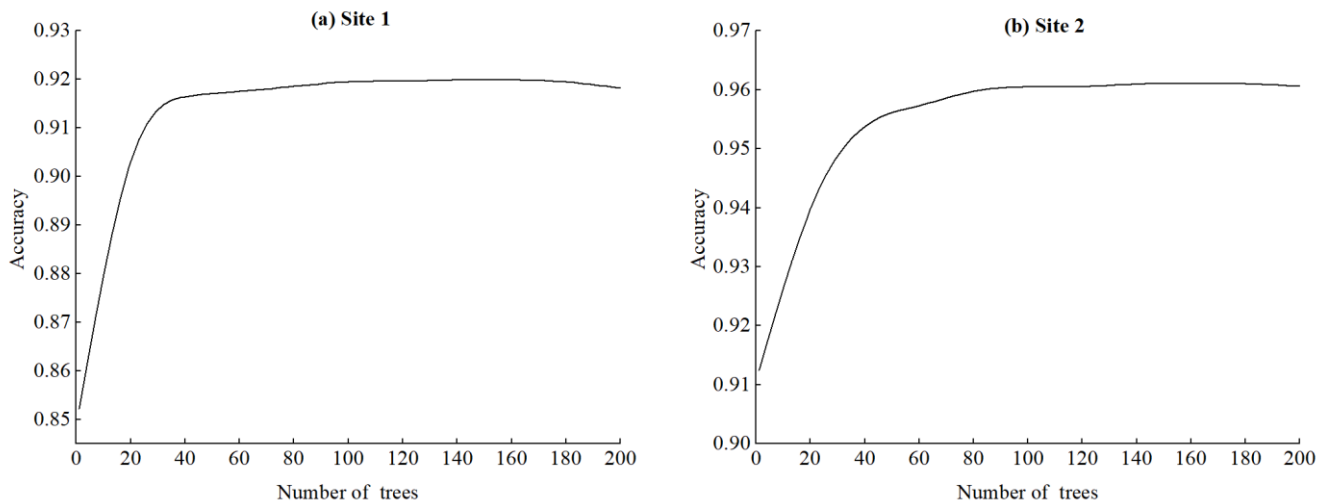

**Figure S6. Trends in accuracy of RF classifiers under different parameters at two study sites.**

**Table S3: Top five features with highest frequency in each province.**

| Provinces | The top five features with the highest frequency |
|-----------|--------------------------------------------------|
| AH        | NDYI, NREDI2, NREDI3, WRI, GCVI                  |
| GS        | NREDI3, OSAVI, B6, NREDI2, NDYI                  |
| HB        | NREDI3, NREDI2, OSAVI, NDVI, NREDI1              |
| HN        | OSAVI, NREDI2, EVI, NREDI1, NDVI                 |
| HuB       | NREDI3, LSWI, GCVI, GNDVI, NDWI                  |
| JS        | NREDI3, EVI, NREDI1, NREDI2, WRI                 |
| NM        | NREDI3, NDYI, OSAVI, NREDI2, B6                  |
| NX        | NREDI3, OSAVI, B6, NREDI2, NDVI                  |
| QH        | NREDI3, NREDI2, WRI, GNDVI, NDWI                 |
| SAX       | NREDI3, NREDI2, NREDI1, OSAVI, NDVI              |
| SC        | NREDI3, NDYI, OSAVI, NREDI2, NREDI1              |
| SD        | SWI, NREDI3, OSAVI, GNDVI, NDVI                  |
| SX        | SWI, OSAVI, NREDI2, EVI, NDVI                    |
| XJ        | EVI, B8A, B7, B8, NREDI3                         |
| ZJ        | RVI, NREDI3, SWI, LSWI, NREDI2                   |

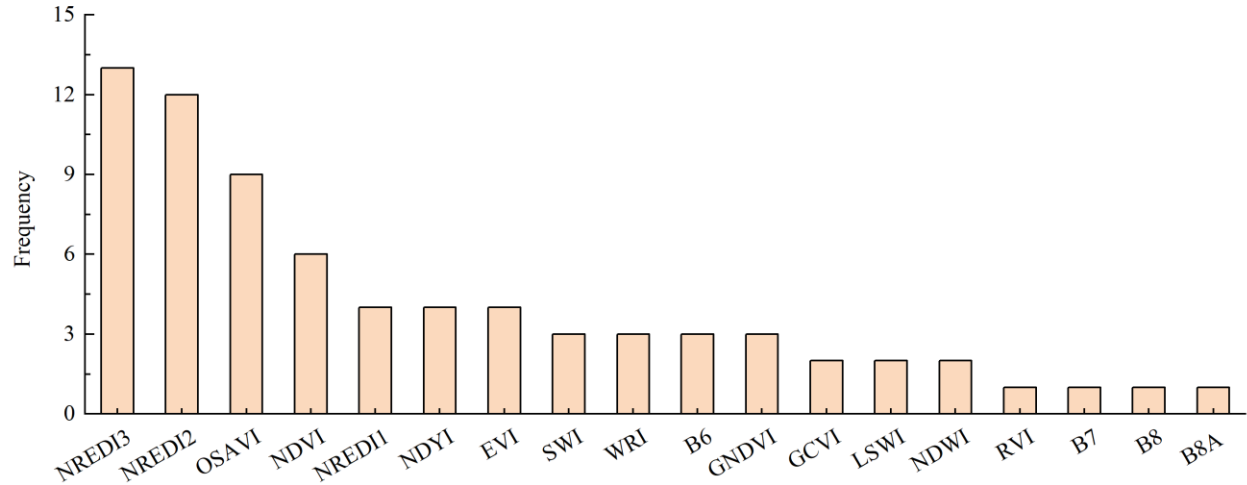

**Figure S7: Frequency used for different spectral features.**



## References

- Fernández-Manso, A., Fernández-Manso, O., and Quintano, C.: SENTINEL-2A red-edge spectral indices suitability for discriminating burn severity, *Int. J. Appl. Earth Obs. Geoinf.*, 50, 170-175, <https://doi.org/10.1016/j.jag.2016.03.005>, 2016.
- Gao, B.-C.: NDWI—A normalized difference water index for remote sensing of vegetation liquid water from space, *Remote Sens. Environ.*, 58, 257-266, [https://doi.org/10.1016/S0034-4257\(96\)00067-3](https://doi.org/10.1016/S0034-4257(96)00067-3), 1996.
- Gitelson, A. and Merzlyak, M. N.: Quantitative estimation of chlorophyll-a using reflectance spectra: Experiments with autumn chestnut and maple leaves, *Journal of Photochemistry Photobiology B: Biology*, 22, 247-252, [https://doi.org/10.1016/1011-1344\(93\)06963-4](https://doi.org/10.1016/1011-1344(93)06963-4), 1994.
- Gitelson, A. A., Kaufman, Y. J., and Merzlyak, M. N.: Use of a green channel in remote sensing of global vegetation from EOS-MODIS, *Remote Sens. Environ.*, 58, 289-298, [https://doi.org/10.1016/S0034-4257\(96\)00072-7](https://doi.org/10.1016/S0034-4257(96)00072-7), 1996.
- Gitelson, A. A., Viña, A., Arkebauer, T. J., Rundquist, D. C., Keydan, G., and Leavitt, B.: Remote estimation of leaf area index and green leaf biomass in maize canopies, *Geophys. Res. Lett.*, 30, <https://doi.org/10.1029/2002GL016450>, 2003.
- Huete, A., Didan, K., Miura, T., Rodriguez, E. P., Gao, X., and Ferreira, L. G.: Overview of the radiometric and biophysical performance of the MODIS vegetation indices, *Remote Sens. Environ.*, 83, 195-213, [https://doi.org/10.1016/S0034-4257\(02\)00096-2](https://doi.org/10.1016/S0034-4257(02)00096-2), 2002.
- Jordan, C. F.: Derivation of leaf-area index from quality of light on the forest floor, *Ecology*, 50, 663-666, <https://doi.org/10.2307/1936256>, 1969.
- Li, S., Wang, S., Zheng, Z., Wan, D., and Feng, J.: A new algorithm for water information extraction from high resolution remote sensing imagery, 2016 IEEE International Conference on Image Processing (ICIP), 4359-4363, <https://doi.org/10.1109/ICIP.2016.7533183>,
- Rondeaux, G., Steven, M., and Baret, F.: Optimization of soil-adjusted vegetation indices, *Remote Sens. Environ.*, 55, 95-107, [https://doi.org/10.1016/0034-4257\(95\)00186-7](https://doi.org/10.1016/0034-4257(95)00186-7), 1996.
- Sulik, J. J. and Long, D. S.: Spectral considerations for modeling yield of canola, *Remote Sens. Environ.*, 184, 161-174, <https://doi.org/10.1016/j.rse.2016.06.016>, 2016.
- Xiao, X., Boles, S., Frolking, S., Li, C., Babu, J. Y., Salas, W., and Moore III, B.: Mapping paddy rice agriculture in South and Southeast Asia using multi-temporal MODIS images, *Remote Sens. Environ.*, 100, 95-113, <https://doi.org/10.1016/j.rse.2005.10.004>, 2006.
- Zhang, H., Liu, W., and Zhang, L.: Seamless and automated rapeseed mapping for large cloudy regions using time-series optical satellite imagery, *ISPRS J. Photogramm. Remote Sens.*, 184, 45-62, <https://doi.org/10.1016/j.isprsjprs.2021.12.001>, 2022.
